# Supplementary material for: N-doped carbon xerogels as adsorbents for the removal of heavy metal ions from aqueous solution
Source: Royal Society of Chemistry journal article supplement (doi:10.1039/c4ra12441c), 2014-12-19
Supplement: c4ra12441c1.pdf [file c4ra12441c1.pdf]

## **N-doped carbon xerogels as adsorbents for removal of heavy metal ions from aqueous solution**

**Bin Yang<sup>1</sup>, Chengxiang Yu<sup>1</sup>, Qingni Yu<sup>1,2</sup>, Xingwang Zhang<sup>1,\*</sup>, Zhongjian Li<sup>1</sup>, Lecheng Lei<sup>1</sup>**

<sup>1</sup>Key Laboratory of Biomass Chemical Engineering of Ministry of Education, Department of Chemical and

Biological Engineering, Zhejiang University, Hangzhou 310027, China

<sup>2</sup>National Key Laboratory of Human Factors Engineering, China Astronaut Research and Training Center, Beijing

100094, China

**Corresponding author: Dr. and Prof. Xingwang Zhang**

**Tel./Fax: +86-571-87952525, E-mail address: [xwzhang@zju.edu.cn](mailto:xwzhang@zju.edu.cn)**

## Adsorption isotherms

**Table S1.** Parameters and correlation coefficients for the isotherm models

| Models     | Parameter      | CX    | NCX-100-2 | NCX-150-2 | NCX-200-2 | NCX-150-1 | NCX-150-1.5 |
|------------|----------------|-------|-----------|-----------|-----------|-----------|-------------|
| Henry      | k              | 0.106 | 0.118     | 0.131     | 0.103     | 0.109     | 0.115       |
|            | R <sup>2</sup> | 0.674 | 0.516     | 0.522     | 0.485     | 0.800     | 0.814       |
| Freundlich | n              | 2.068 | 2.845     | 2.640     | 2.598     | 4.002     | 4.314       |
|            | K <sub>F</sub> | 3.665 | 10.387    | 9.576     | 7.710     | 16.778    | 20.071      |
|            | R <sup>2</sup> | 0.929 | 0.867     | 0.831     | 0.846     | 0.914     | 0.974       |

## Adsorption kinetics

### Intraparticle diffusion model

$$R = k_t t^m \quad (S1)$$

$$\ln R = m \ln t + \ln k_t \quad (S2)$$

where  $R$  is the percentage adsorption and  $t$  is the contact time (min).  $k_t$  and  $m$  are the intraparticle diffusion rate constant and exponent factor, respectively. The value of  $\ln R$  were plotted against  $\ln t$ , as shown in **Figure S1 (a)**.

### Pseudo-first-order model

$$q_t = q_e \cdot [1 - \exp(-k_1 t)] \quad (S3)$$

$$\text{or } \ln(q_e - q_t) = \ln q_e - k_1 t \quad (S4)$$

where  $q_t$  is the adsorbed amount of Pb ions at equilibrium and  $k_1$  is the rate constant. The linear fit of  $\ln(q_e - q_t)$  against  $t$  can be described in **Figure S1 (b)**.

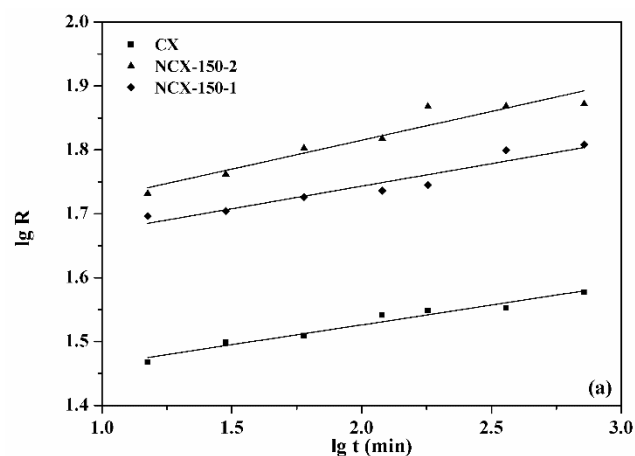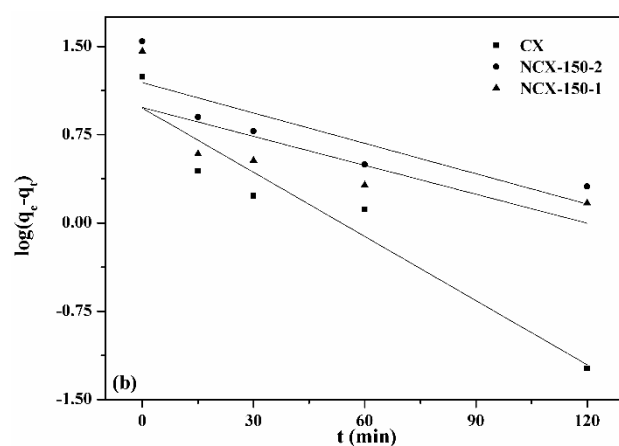

**Figure S1.** The adsorption kinetics including (a) intraparticle diffusion and (b) pseudo-first-order models.

**Table S2.** Parameters and correlation coefficients for the kinetic models

| Models                  | Parameter                   | CX     | NCX-150-2 | NCX-150-1 |
|-------------------------|-----------------------------|--------|-----------|-----------|
| Intraparticle diffusion | $k_t$ ( $\text{min}^{-1}$ ) | 25.221 | 43.104    | 39.982    |
|                         | $m$                         | 0.062  | 0.090     | 0.071     |
|                         | $R^2$                       | 0.956  | 0.902     | 0.909     |
| Pseudo-first-order      | $k_l$ ( $\text{h}^{-1}$ )   | 6.777  | 4.995     | 7.195     |
|                         | $q_e$ (mg/g)                | 17.4   | 34.9      | 28.7      |
|                         | $R^2$                       | 0.976  | 0.956     | 0.945     |
